# Supplementary material for: The Arabidopsis thaliana LysM‐containing Receptor‐Like Kinase 2 is required for elicitor‐induced resistance to pathogens
Source: PubMed Central journal article supplement (PMC9293440; doi:10.1111/pce.14192), 2021-09-30
Supplement: PCE-44-3775-s002.pdf [file PCE-44-3775-s002.pdf]

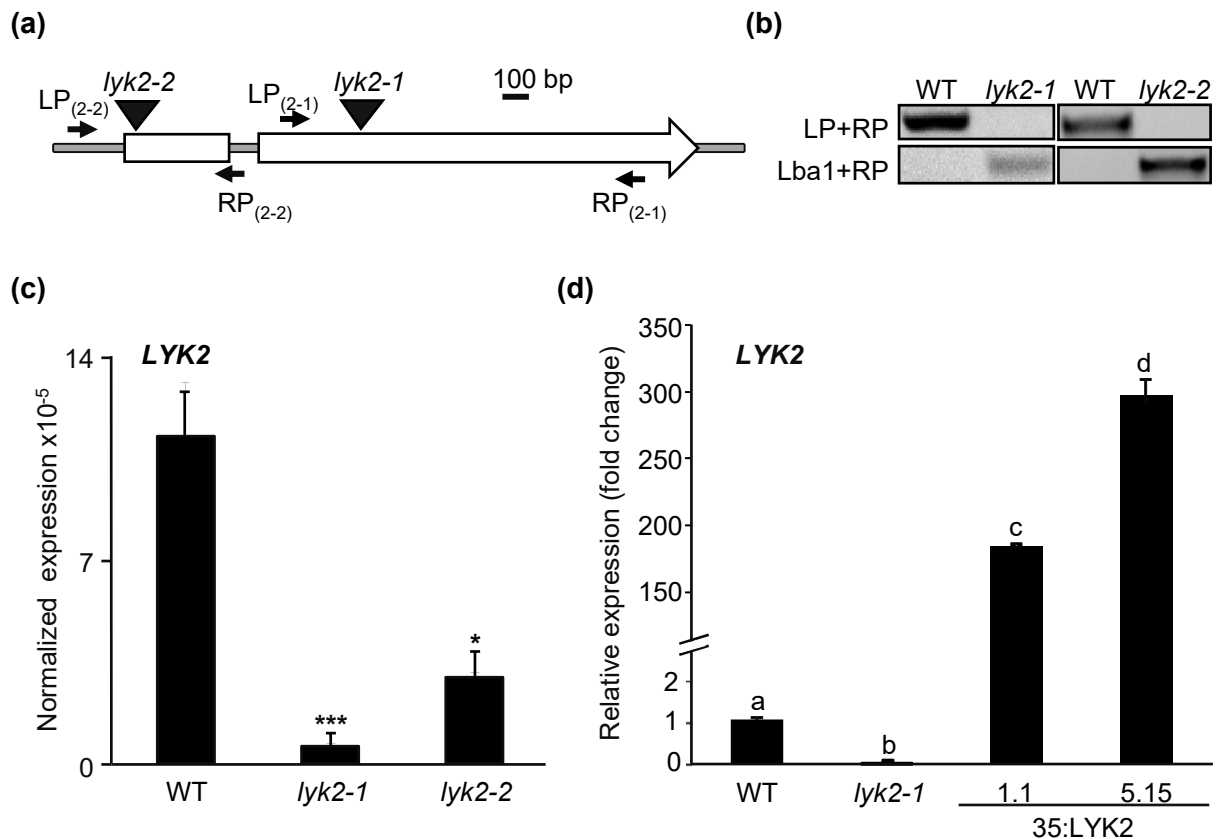

**Supplementary Figure 1. Characterization of *lyk2* insertional mutant lines and of plants overexpressing *LYK2*.** (a) Schematic representation of the T-DNA insertions in the *lyk2-1* and *lyk2-2* mutants. Exons are represented by white blocks. The triangles indicate the T-DNA insertions. Arrows indicate the position of the primers used for genotyping, namely LP<sub>(2-1)</sub> and RP<sub>(2-1)</sub> for *lyk2-1* and LP<sub>(2-2)</sub> and RP<sub>(2-2)</sub> for *lyk2-2*. (b) Genomic DNA from WT, *lyk2-1* and *lyk2-2* homozygous plants was subjected to PCR using the primer pairs specific for the WT gene (LP+RP) or for the T-DNA insertion (Lba1+RP). Primer sequences are listed in Suppl. Table 1. (c) Accumulation of *LYK2* transcripts was analysed by qRT-PCR in ten-day-old WT, *lyk2-1* and *lyk2-2* seedlings, using *UBQ5* as reference gene. Bars represent mean expression ( $\pm$  SD, n = 3 independent replicates). Asterisks indicate significant differences between WT and mutants, according to Student's *t*-test (\*\*\*, P < 0.001; \*, P < 0.05). (d) *LYK2* transcript levels in ten-day-old untransformed WT and *lyk2-1* seedlings and in two independent lines transformed with 35S:*LYK2* (line 1.1 and 5.15) were quantified as in (c). Bars represent mean relative expression, compared to the WT ( $\pm$  SD, n = 3 independent replicates). Different letters indicate statistically significant differences, according to one-way ANOVA followed by Tukey's HSD test (P < 0.01). The results are representative of two independent experiments.

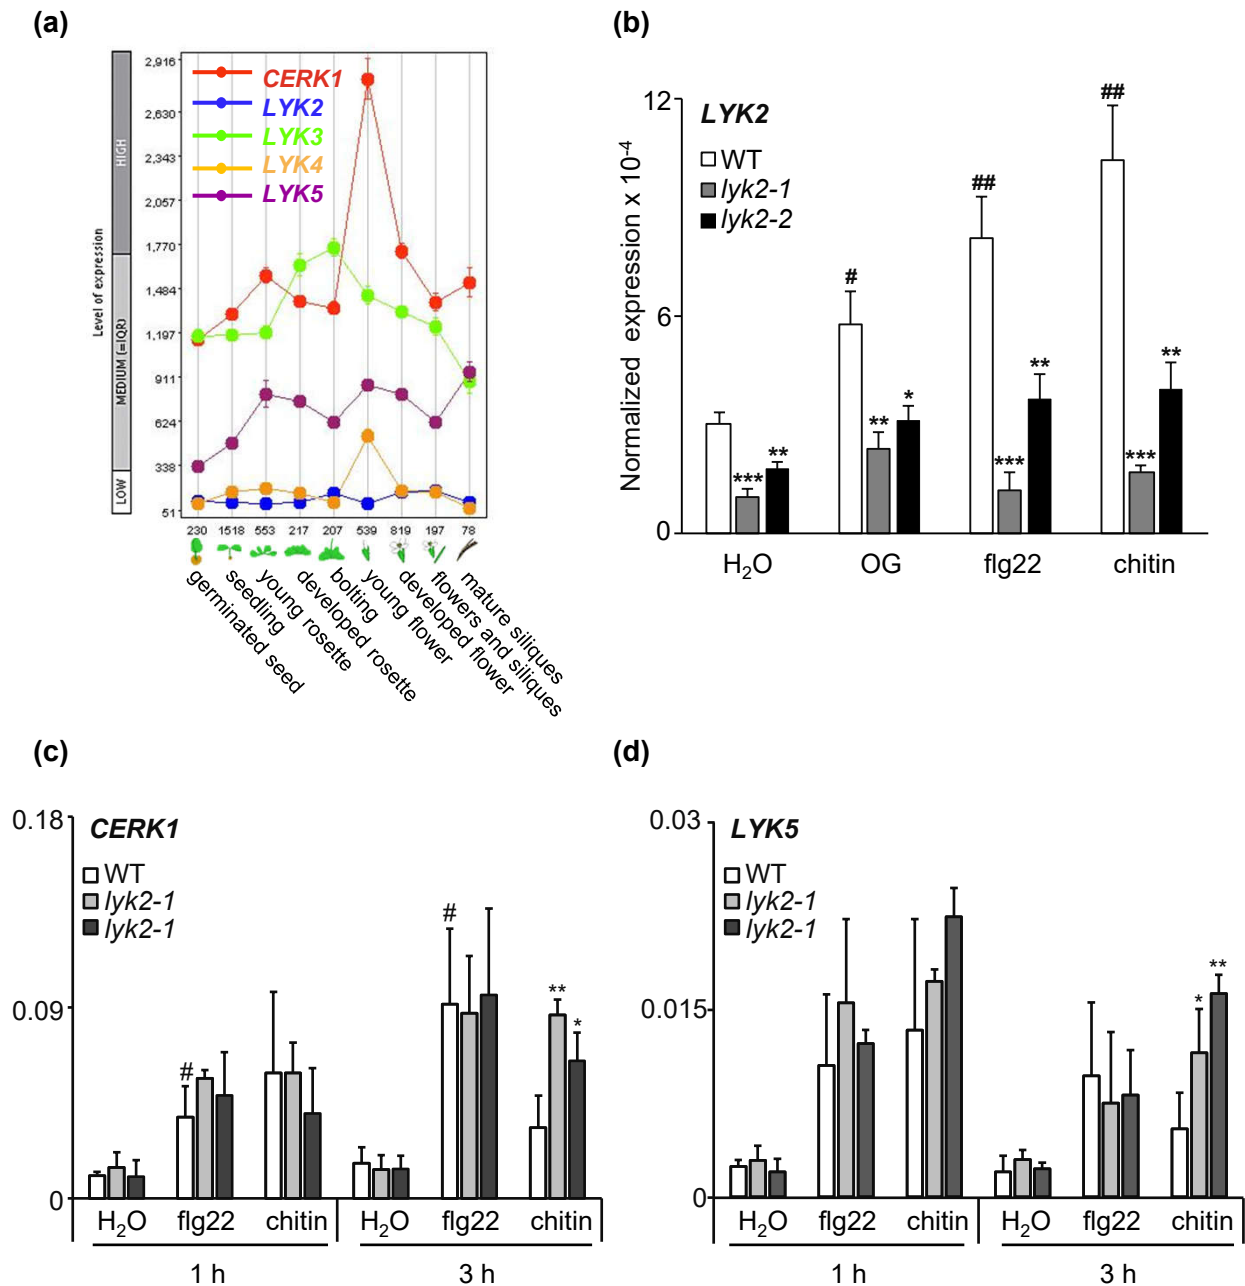

**Supplementary Figure 2. Basal and elicitor-induced expression of *LYK2* in WT and *lyk2* plants.** (a) Developmental stage-specific expression levels of *LYK2*, *CERK1*, *LYK3*, *LYK4* and *LYK5* were obtained from publicly available data using Genevestigator. (b-d) Ten-day-old WT, *lyk2-1* and *lyk2-2* seedlings were treated with OGs (50  $\mu\text{g ml}^{-1}$ ) (b), flg22 (10 nM), chitin (25  $\mu\text{g ml}^{-1}$ ), or water as control (b-d), and accumulation of *LYK2* (b), *CERK1* (c) and *LYK5* (d) transcripts after 1 h (b-d) and 3 h (c-d) was analysed by qRT-PCR. *UBQ5* was used as reference gene. Bars indicate mean expression  $\pm$  SE (n = 3 independent replicates). Asterisks indicate significant differences between WT and mutants, according to Student's *t*-test (\*\*\*,  $P < 0.001$ ; \*\*,  $P < 0.01$ ; \*,  $P < 0.05$ ). Pound signs indicate significant differences between elicitor- and water-treated plants, according to Student's *t*-test (#,  $P < 0.05$ ). This experiment was repeated twice with similar results.

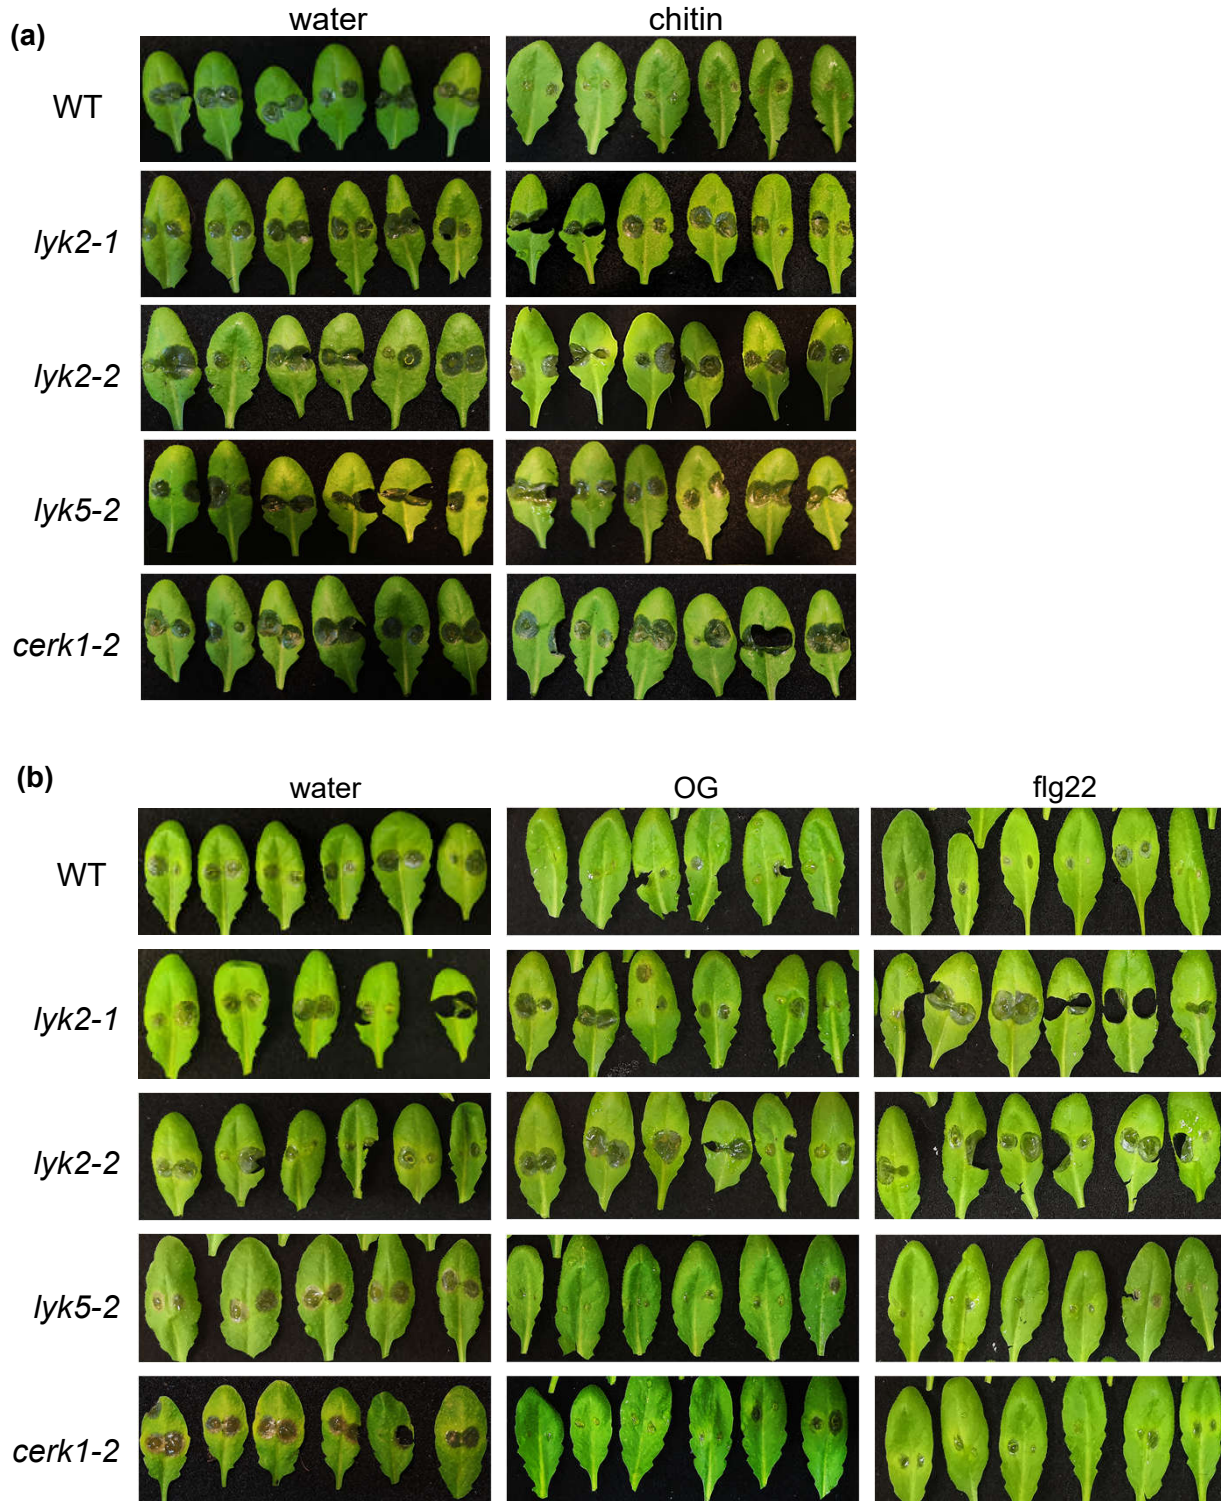

**Supplementary Figure 3. Lesion development in *lyk* mutants infected with *Botrytis cinerea* after pre-treatment with elicitors.** Leaves of four-week-old WT, *lyk2-1*, *lyk2-2*, *lyk5-2*, and *cerk1-2* plants were sprayed with water or 100  $\mu\text{g ml}^{-1}$  chitin (a), 200  $\mu\text{g ml}^{-1}$  OG or 1  $\mu\text{M}$  flg22 (b). After 24 h, leaves were inoculated with a *B. cinerea* spore suspension. Representative images of infected leaves 48 h after inoculation are shown. This experiment was repeated three times with similar results.

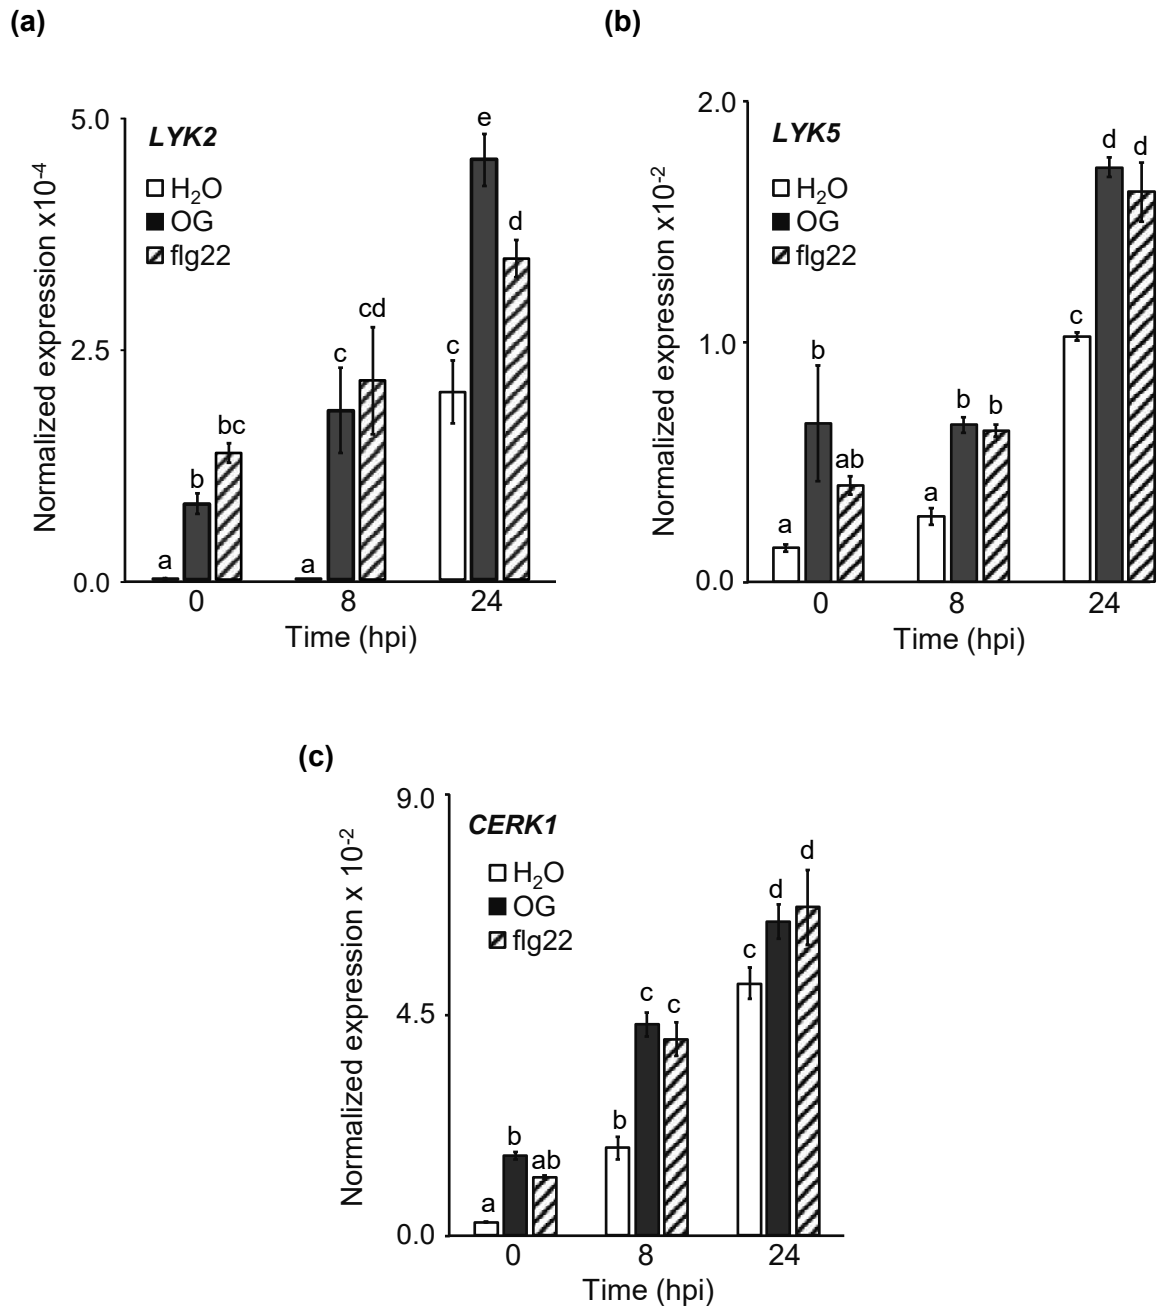

**Supplementary Figure 4. Basal and primed expression of *LYK* genes during fungal infection.** Four-week-old *Arabidopsis* leaves were treated with water, OGs (200  $\mu\text{g ml}^{-1}$ ) or flg22 (1  $\mu\text{M}$ ) and, after 24 h, they were inoculated with *B. cinerea*. Accumulation of *LYK2* (a), *LYK5* (b) and *CERK1* (c) transcripts was analysed at 0, 8, and 24 h post-inoculation (hpi) by qRT-PCR. *UBQ5* was used for normalization. Bars indicate average expression of three technical replicates. Different letters indicate statistically significant differences according to one-way ANOVA followed by Tukey's HSD test ( $P < 0.05$ ). This experiment was repeated twice with similar results.

**(a)**

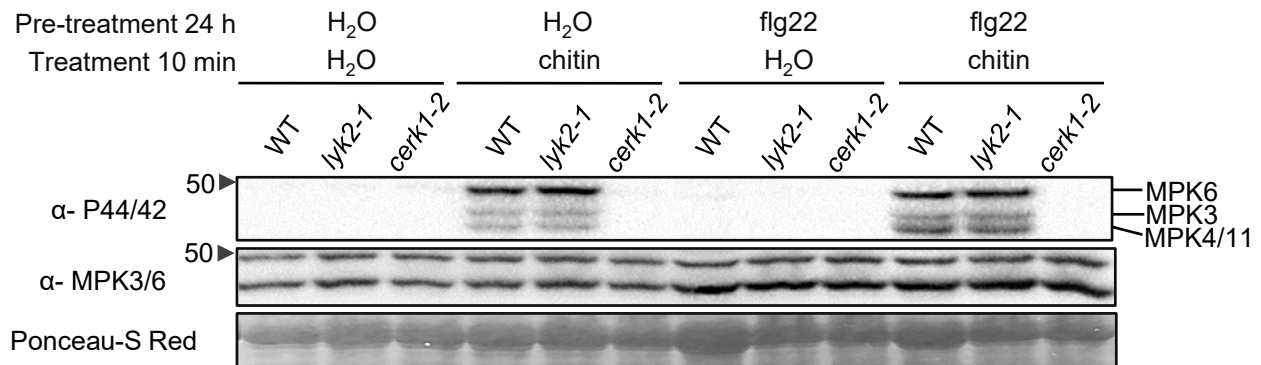

**(b)**

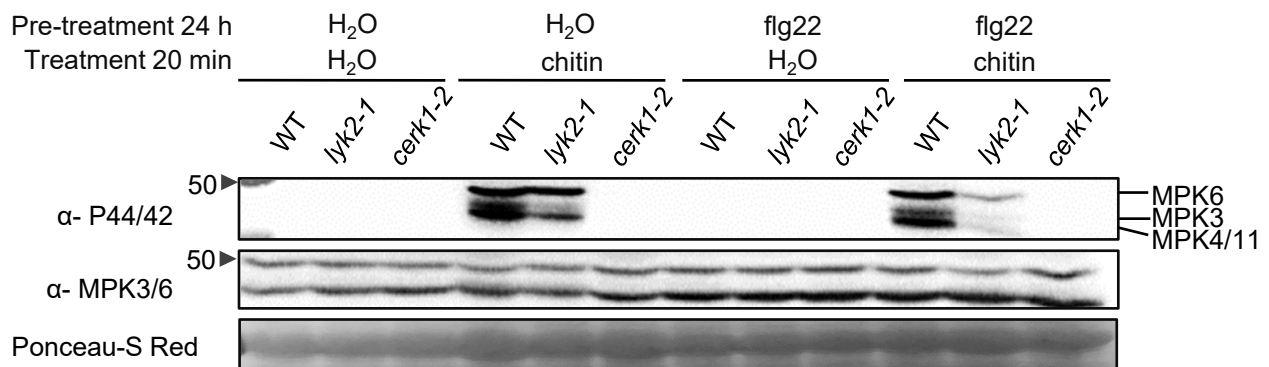

**Supplementary Figure 5. Chitin-triggered MAPK activation in *lyk2-1* and *cerk1-2* mutants.** Ten-day-old WT, *lyk2-1* and *cerk1-2* seedlings were pre-treated with water or flg22 (10 nM) for 24 h and subsequently treated with water or chitin (25 μg ml<sup>-1</sup>) for 10 min **(a)** or 20 min **(b)**. Phosphorylated MPK3, MPK4, MPK6 and MPK11 were detected by immunoblot using an anti-P44/P42 antibody. Antibodies against total MPK3 and MPK6 were used as controls. Equal loading was evaluated by Ponceau-S Red staining. Arrows indicate the molecular weight (in kDa) of the marker bands.

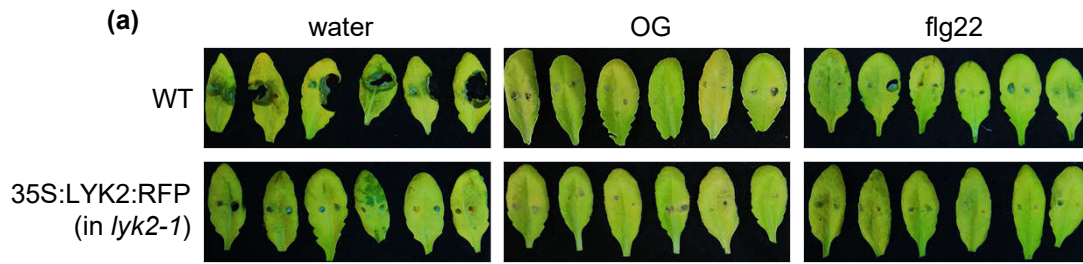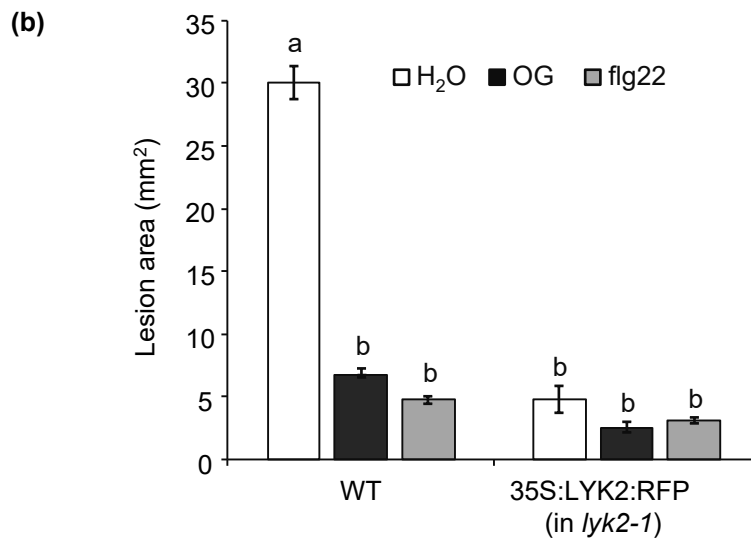

**Supplementary Figure 6. Overexpression of LYK2-RFP increases resistance to *B. cinerea*.** (a-b) Leaves of WT and *lyk2-1* plants transformed with 35S:LYK2-RFP were treated with water, OGs (200  $\mu\text{g ml}^{-1}$ ) or flg22 (1  $\mu\text{M}$ ) and inoculated with *B. cinerea* 24 h after elicitor treatment. (a) Representative images of infected leaves at 48 h post infection. (b) Average lesion area ( $\pm$  SE, n = 12). Different letters indicate statistically significant differences according to one-way ANOVA followed by Tukey's HSD test ( $P < 0.05$ ). This experiment was repeated twice with similar results.

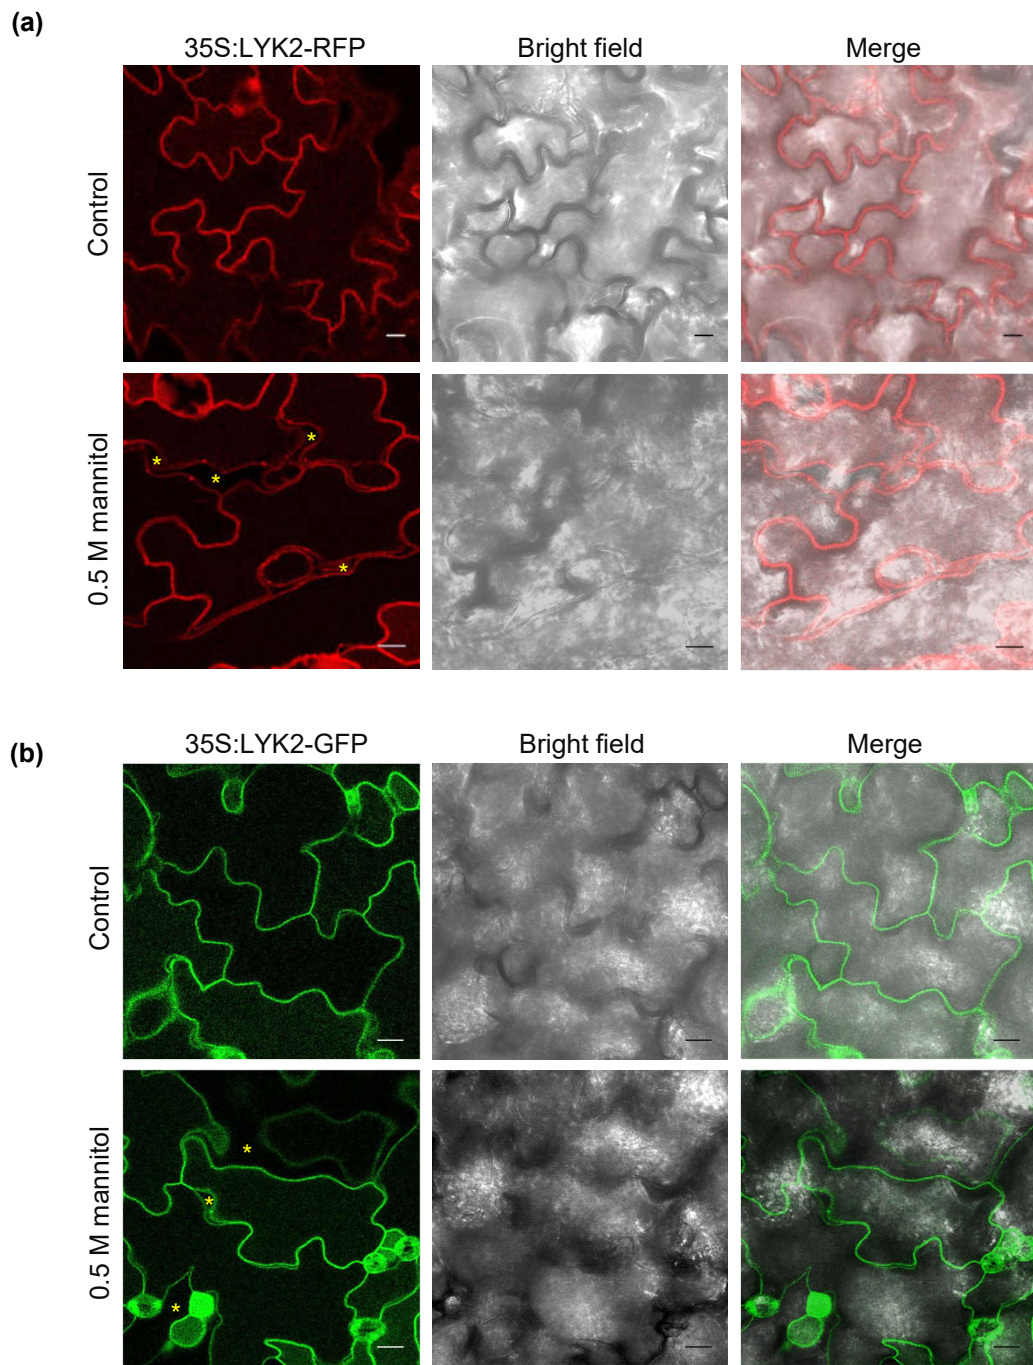

**Supplementary Figure 7. LYK2 localizes at the plasma membrane.** Representative confocal laser scanning microscopy, bright field and merge images of epidermal cells of cotyledons of transgenic *Arabidopsis lyk2-1* plants transformed with 35S:LYK2-RFP (a) and of *Arabidopsis* WT plants transformed with 35S:LYK2-GFP (b), treated with water or 0.5 M mannitol for 20 min. The images are of single focal planes. Bars = 10  $\mu$ m.
